# Supplementary material for: Brief communication: On the potential of seismic polarity reversal to detect a thin low-velocity layer above a high-velocity layer in ice-rich rock glaciers
Source: Copernicus journal article supplement (doi:10.5194/egusphere-2023-2774), 2023-12-19

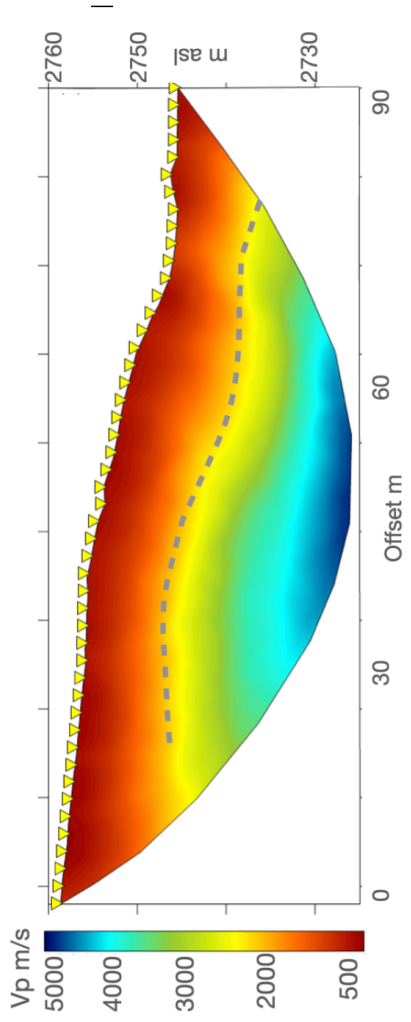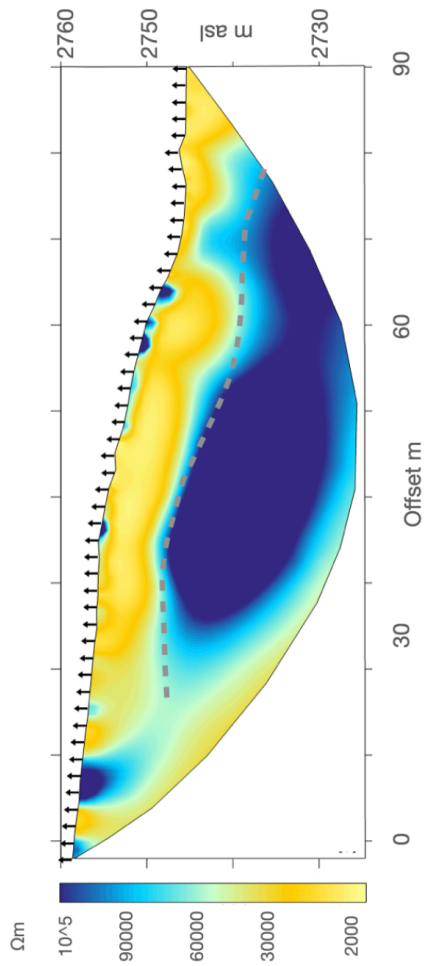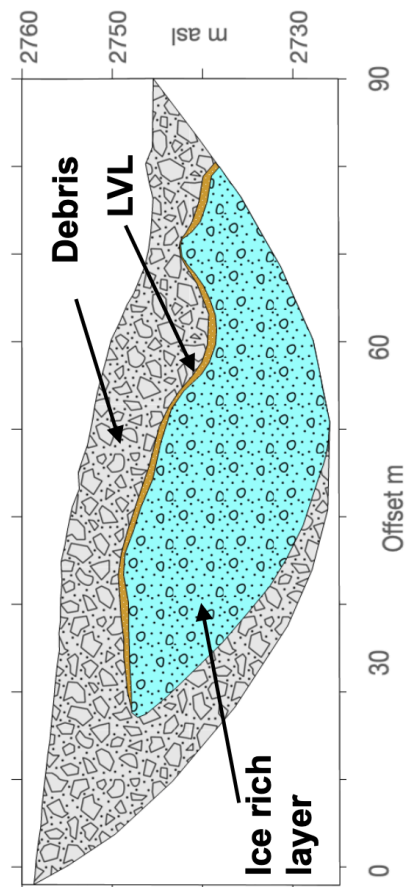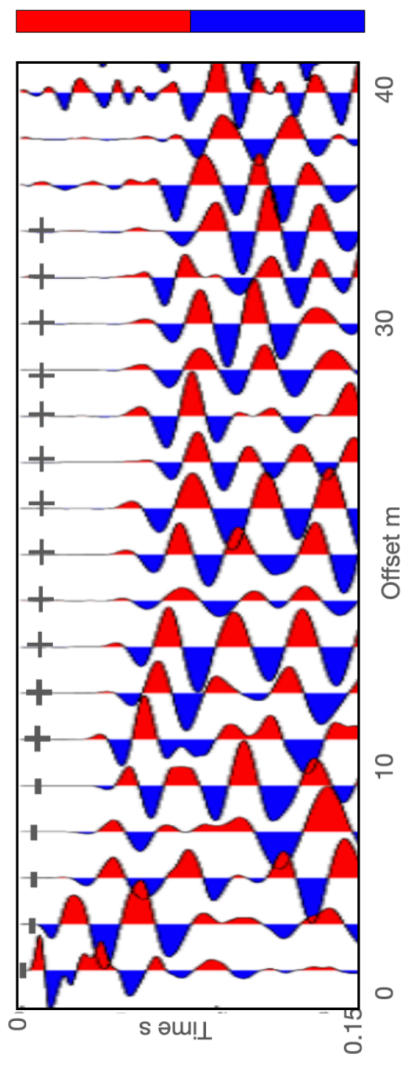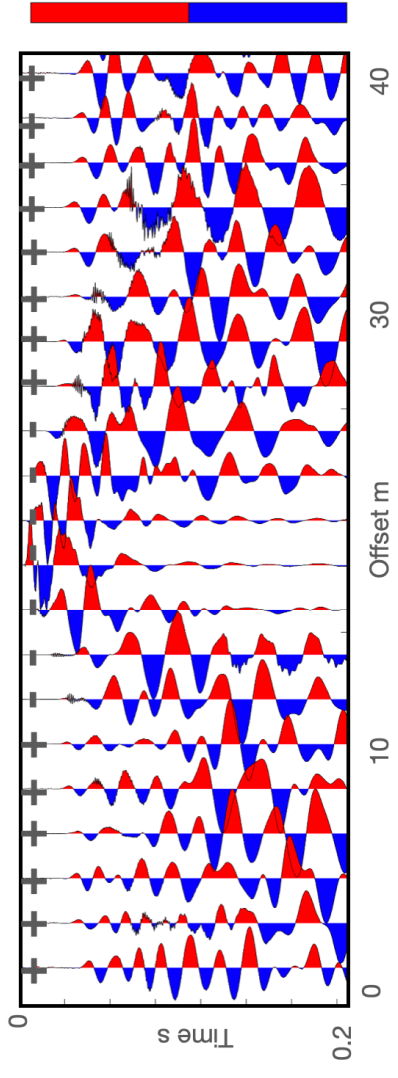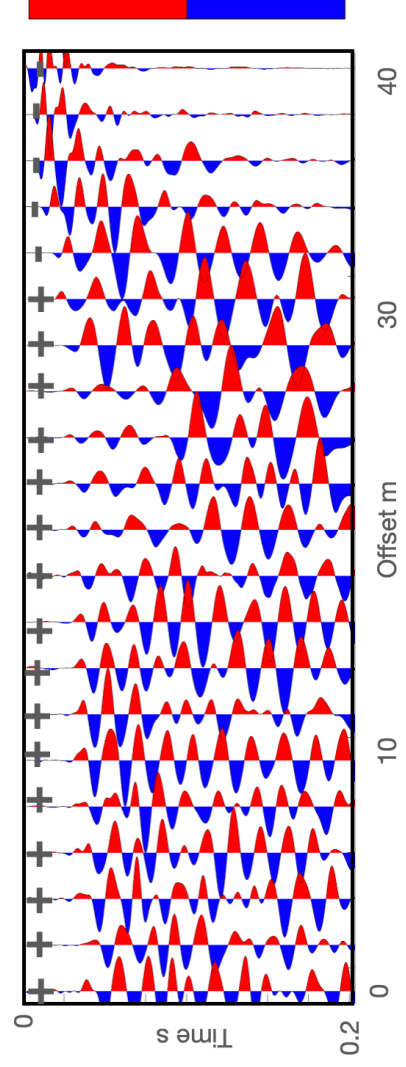

Supplement: Supplementary file [file egusphere-2023-2774-AC2-supplement.pdf]
